# Supplementary material for: Primary Care Providers’ Views on Metabolic Monitoring of Outpatients Taking Antipsychotic Medication
Source: Atypon-hosted journal article supplement (doi:10.1176/appi.ps.002542012), 2013-06-01
Supplement: 597_ds001.pdf [file 597_ds001.pdf]

**APPENDIX: Primary Care Providers Questionnaire**

11. Approximate percentage of these psychiatric patients that are being prescribed antipsychotic medications at risk for causing metabolic dysfunction, such as increased BMI, obesity, and diabetes (e.g. olanzapine, risperdone, chlorpromazine): \_\_\_\_\_ %

12. Are you aware of the ADA/APA (American Diabetes Association, American Psychiatric Association) consensus statement describing metabolic risks associated with second generation antipsychotic medications and specifying a monitoring protocol for patients taking these medications?

YES

NO

**Physician Attitudes:**

For each question, please circle the choice that best fits your response:

13. How strongly do you agree or disagree with the following statements?

a. **Individuals with schizophrenia are more at risk than the general population for suffering metabolic dysfunction, such as increased BMI, obesity, and diabetes.**

Strongly disagree

Disagree

Neutral

Agree

Strongly agree

b. **Some antipsychotic medications can contribute to metabolic dysfunction, such as increased BMI, obesity, and diabetes.**

Strongly disagree

Disagree

Neutral

Agree

Strongly agree

**Physician Roles:**

For each question, please circle the choice that best fits your response:

**Roles in Monitoring:**

14. How strongly do you agree or disagree with the following statements?

Monitoring metabolic risk factors (such as BMI, BP, glucose, and/or lipids) in patients on antipsychotics at risk of causing metabolic dysfunction is the role of:

a. **Primary care providers, not psychiatrists** or mental health clinics.

Strongly disagree

Disagree

Neutral

Agree

Strongly agree

b. The **psychiatrist or mental health clinic**, *only if* patients do not have an established primary care provider.

Strongly disagree

Disagree

Neutral

Agree

Strongly agree

c. The **psychiatrist or mental health clinic**, *even if* patients have established primary care.

Strongly disagree

Disagree

Neutral

Agree

Strongly agree

→ Continue

**Roles in Treatment:**

15. How strongly do you agree or disagree with the following statements about the responsibility of **community psychiatrists**?

If patients **in a mental health clinic** are found to have abnormalities in metabolic risk factors that are likely caused by treatment with antipsychotic medications, the following interventions may be the **responsibility of the treating psychiatrist**:

- a. Responsibility of **psychiatrists to refer to primary care providers** or other medical follow-up  

|                   |          |         |       |                |
|-------------------|----------|---------|-------|----------------|
| Strongly disagree | Disagree | Neutral | Agree | Strongly agree |
|-------------------|----------|---------|-------|----------------|
- b. Responsibility of **psychiatrists to directly contact patients' primary care** or other medical providers  

|                   |          |         |       |                |
|-------------------|----------|---------|-------|----------------|
| Strongly disagree | Disagree | Neutral | Agree | Strongly agree |
|-------------------|----------|---------|-------|----------------|
- c. Responsibility of **psychiatrists to maintain contact with primary care** or other medical providers regarding continuing treatment of metabolic risk factors  

|                   |          |         |       |                |
|-------------------|----------|---------|-------|----------------|
| Strongly disagree | Disagree | Neutral | Agree | Strongly agree |
|-------------------|----------|---------|-------|----------------|
- d. Responsibility of **psychiatrists to provide patients with literature** regarding metabolic syndrome and related metabolic risk indicators  

|                   |          |         |       |                |
|-------------------|----------|---------|-------|----------------|
| Strongly disagree | Disagree | Neutral | Agree | Strongly agree |
|-------------------|----------|---------|-------|----------------|
- e. Responsibility of **psychiatrists to refer patients to weight loss programs**, or other related psychosocial or support group programs  

|                   |          |         |       |                |
|-------------------|----------|---------|-------|----------------|
| Strongly disagree | Disagree | Neutral | Agree | Strongly agree |
|-------------------|----------|---------|-------|----------------|
- f. Responsibility of **psychiatrists to refer patients to smoking cessation programs**  

|                   |          |         |       |                |
|-------------------|----------|---------|-------|----------------|
| Strongly disagree | Disagree | Neutral | Agree | Strongly agree |
|-------------------|----------|---------|-------|----------------|

16. How strongly do you agree or disagree with the following statement?

- a. Prescribing oral medications to treat elements of metabolic dysfunction (e.g., statins, metformin) may, **in certain circumstances**, be the responsibility of **the outpatient treating psychiatrist**.

|                   |          |         |       |                |
|-------------------|----------|---------|-------|----------------|
| Strongly disagree | Disagree | Neutral | Agree | Strongly agree |
|-------------------|----------|---------|-------|----------------|

- b. In which of the following circumstances do you think it would be appropriate to have the **treating outpatient psychiatrist** prescribe oral medications to treat elements of metabolic dysfunction? Please select all that apply.

- In extremely rare circumstances (e.g., patients requesting emergency refills)
- Sharing responsibility for treatment in partnership with a primary care or other medical provider
- If a patient does not have access to primary care or other medical providers
- If the **psychiatrist** is the sole provider treating elements of metabolic dysfunction

→ Continue

**Barriers to Monitoring:**

17. In the following section, please rate the degree to which the factors listed below are significant barriers to monitoring *your* patients for metabolic risk. For each factor, circle one of the following that best suits your response to whether you agree or disagree that the factor is a significant barrier to monitoring: strongly disagree (1), disagree (2), neutral (3), agree (4), or strongly agree (5), or select N/A if the factor is not relevant to your patients or practice environment.

I believe the following **patient factors** are a barrier to monitoring patients for monitoring metabolic risk:

|                                 | Strongly disagree | Disagree | Neutral | Agree | Strongly agree |     |
|---------------------------------|-------------------|----------|---------|-------|----------------|-----|
| Gender                          | 1                 | 2        | 3       | 4     | 5              | N/A |
| Lack of insurance               | 1                 | 2        | 3       | 4     | 5              | N/A |
| Lack of income                  | 1                 | 2        | 3       | 4     | 5              | N/A |
| Ethnic or cultural factors      | 1                 | 2        | 3       | 4     | 5              | N/A |
| Fluency of English              | 1                 | 2        | 3       | 4     | 5              | N/A |
| Legal status                    | 1                 | 2        | 3       | 4     | 5              | N/A |
| Lack of education               | 1                 | 2        | 3       | 4     | 5              | N/A |
| Severity of psychiatric illness | 1                 | 2        | 3       | 4     | 5              | N/A |

I believe the following **staffing or physician factors (at your primary care clinic)** are a barrier to monitoring patients for monitoring metabolic risk:

|                                                             | Strongly disagree | Disagree | Neutral | Agree | Strongly agree |     |
|-------------------------------------------------------------|-------------------|----------|---------|-------|----------------|-----|
| Insufficient staff availability                             | 1                 | 2        | 3       | 4     | 5              | N/A |
| Insufficient staff awareness                                | 1                 | 2        | 3       | 4     | 5              | N/A |
| Insufficient staff training                                 | 1                 | 2        | 3       | 4     | 5              | N/A |
| Insufficient physician time                                 | 1                 | 2        | 3       | 4     | 5              | N/A |
| Ability to counsel this population about metabolic problems | 1                 | 2        | 3       | 4     | 5              | N/A |
| Ability to treat metabolic problems in this population      | 1                 | 2        | 3       | 4     | 5              | N/A |
| Insufficient reimbursement for screening                    | 1                 | 2        | 3       | 4     | 5              | N/A |
| Insufficient reimbursement for treatment                    | 1                 | 2        | 3       | 4     | 5              | N/A |
| Burden of documentation                                     | 1                 | 2        | 3       | 4     | 5              | N/A |
| Difficulty accessing laboratory data                        | 1                 | 2        | 3       | 4     | 5              | N/A |
| Medicolegal liability of testing patients                   | 1                 | 2        | 3       | 4     | 5              | N/A |
| Medicolegal liability of treatment                          | 1                 | 2        | 3       | 4     | 5              | N/A |

I believe the following **referral and collaboration factors** are a barrier to monitoring patients for monitoring metabolic risk in our health care system in San Francisco County:

|                                                                          | Strongly disagree | Disagree | Neutral | Agree | Strongly agree |     |
|--------------------------------------------------------------------------|-------------------|----------|---------|-------|----------------|-----|
| Difficulty arranging referral for psychiatric follow-up                  | 1                 | 2        | 3       | 4     | 5              | N/A |
| Lack of access to psychiatric follow-up                                  | 1                 | 2        | 3       | 4     | 5              | N/A |
| Wait times for appointments for psychiatric follow-up                    | 1                 | 2        | 3       | 4     | 5              | N/A |
| Difficulty collaborating with physicians providing psychiatric follow-up | 1                 | 2        | 3       | 4     | 5              | N/A |
| Increased cost of collaborative care                                     | 1                 | 2        | 3       | 4     | 5              | N/A |

→ Continue

18. Please use the below list of barriers to answer the following questions:

a. Please rank numerically (**with 1, 2, and 3**) what you think are the **top 3 barriers** in your practice to screening and monitoring patients on antipsychotics at risk for causing metabolic dysfunction:

- |                                                          |                                                                                     |
|----------------------------------------------------------|-------------------------------------------------------------------------------------|
| <input type="checkbox"/> Gender                          | <input type="checkbox"/> Ability to counsel these patients about metabolic problems |
| <input type="checkbox"/> Lack of insurance               | <input type="checkbox"/> Ability to treat metabolic problems in this population     |
| <input type="checkbox"/> Lack of income                  | <input type="checkbox"/> Insufficient reimbursement for screening                   |
| <input type="checkbox"/> Ethnic or cultural factors      | <input type="checkbox"/> Insufficient reimbursement for treatment                   |
| <input type="checkbox"/> Fluency of English              | <input type="checkbox"/> Burden of documentation                                    |
| <input type="checkbox"/> Legal status                    | <input type="checkbox"/> Difficulty accessing laboratory data                       |
| <input type="checkbox"/> Lack of education               | <input type="checkbox"/> Medicolegal liability of testing patients                  |
| <input type="checkbox"/> Severity of psychiatric illness | <input type="checkbox"/> Medicolegal liability of treatment                         |
| <input type="checkbox"/> Insufficient staff availability | <input type="checkbox"/> Difficulty arranging referral for psychiatric follow-up    |
| <input type="checkbox"/> Insufficient staff awareness    | <input type="checkbox"/> Lack of access to qualified psychiatric follow-up          |
| <input type="checkbox"/> Insufficient staff training     | <input type="checkbox"/> Wait times for appointments for psychiatric follow-up      |
| <input type="checkbox"/> Insufficient physician time     | <input type="checkbox"/> Difficulty collaborating with psychiatrists                |
|                                                          | <input type="checkbox"/> Increased cost of collaborative care                       |

b. If you could only choose **ONE** barrier from the above list of barriers that has the largest impact on screening, which would that be?

---

19. How strongly do you agree or disagree with the following statement?

Solving the **ONE** barrier I have listed above is likely to make a measurable impact in the rate of metabolic screening for patients at risk for developing metabolic dysfunction.

Strongly disagree      Disagree      Neutral      Agree      Strongly agree

**Thank You!**
